# Supplementary material
Source: PubMed Central journal article supplement (PMC2878175)
Supplement: ac100565b_si_001.pdf [file ac100565b_si_001.pdf]

# **SUPPLEMENTAL MATERIALS**

## **NMR Approach for Measuring Carbon-13 Isotopic Enrichment of Metabolites in Complex Solutions**

**Ian A. Lewis, Ryan H. Karsten, Mark E. Norton, Marco Tonelli, William M. Westler and John L. Markley\***

*National Magnetic Resonance Facility at Madison, Department of Biochemistry, University of Wisconsin-Madison, 433 Babcock Drive, Madison WI 53706*

\*Corresponding author. Tel: 608-263-9349. Fax: 608-262-3759. E-mail: markley@nmrfam.wisc.edu

**Table S-1.** Concentrations of [U-<sup>13</sup>C] metabolite standards in synthetic metabolite mixtures. Each mixture contained 30 unlabeled metabolites\*\* prepared at 2 mM.

|           | <b>Alanine</b> | <b>Fructose</b> | <b>Glucose</b> | <b>Glutamate</b> | <b>Glutamine</b> | <b>Lactate</b> |
|-----------|----------------|-----------------|----------------|------------------|------------------|----------------|
| <b>1</b>  | 2.15           | 5.76            | 3.71           | 4.96             | 1.59             | 1.87           |
| <b>2</b>  | 2.69           | 5.22            | 1.06           | 3.22             | 3.31             | 4.54           |
| <b>3</b>  | 1.48           | 4.96            | 0.27*          | 5.50             | 4.77             | 3.07           |
| <b>4</b>  | 0.54           | 2.95            | 3.05           | 1.74             | 5.30             | 6.41*          |
| <b>5</b>  | 4.85           | 4.29*           | 0.27           | 2.95             | 1.59             | 6.14           |
| <b>6</b>  | 2.02           | 2.01            | 1.86           | 6.04*            | 4.90             | 3.20           |
| <b>7</b>  | 0.40*          | 5.63            | 4.11           | 4.29             | 4.24             | 1.33           |
| <b>8</b>  | 3.37           | 5.63            | 3.05*          | 4.29             | 0.79             | 2.94*          |
| <b>9</b>  | 0.67           | 3.62            | 6.10           | 1.61             | 4.10             | 3.87           |
| <b>10</b> | 2.42           | 4.42            | 4.51           | 4.96             | 1.59             | 2.14           |
| <b>11</b> | 5.93           | 6.03            | 2.52           | 2.28             | 1.06             | 2.27           |
| <b>12</b> | 4.98           | 0.67            | 5.57           | 4.96             | 2.12             | 1.74           |
| <b>13</b> | 2.15           | 4.82            | 3.45           | 1.88             | 3.97             | 3.74           |
| <b>14</b> | 6.33           | 1.88            | 3.31           | 0.54             | 5.56             | 2.40           |
| <b>15</b> | 6.46           | 1.88            | 2.25           | 4.43             | 2.65             | 2.40           |
| <b>16</b> | 2.69*          | 0.13*           | 4.11           | 5.10             | 3.84             | 4.14           |
| <b>17</b> | 4.71           | 4.42            | 3.18           | 1.21             | 6.35*            | 0.13*          |
| <b>18</b> | 6.46*          | 1.74            | 1.06           | 3.89             | 2.52*            | 4.41           |
| <b>19</b> | 4.04           | 4.69            | 4.51           | 2.15             | 1.59             | 3.07           |
| <b>20</b> | 4.58           | 6.03*           | 1.06           | 2.82*            | 3.04             | 2.54           |
| <b>21</b> | 5.12           | 4.96            | 3.84           | 0.27*            | 0.26*            | 5.61           |
| <b>22</b> | 2.42           | 5.63            | 2.78           | 1.74             | 2.38             | 5.07           |
| <b>23</b> | 3.77           | 1.34            | 6.36*          | 5.90             | 0.53             | 2.14           |
| <b>24</b> | 3.10           | 2.95            | 4.77           | 2.15             | 2.78             | 4.27           |

\* Signals from these metabolites were excluded from the regression analysis (Figure 3) because they were used as standards for deriving the empirical correction factors.

\*\* Unlabeled metabolites included acetate, adenosine, alanine, arginine, asparagine, aspartate, betaine, choline, citrate, fructose, 4-aminobutyrate, glucose, glutamate, glutamine, glycerol, glycine, HEPES, histidine, isoleucine, lactate, leucine, malate, ornithine, phenylalanine, proline, serine, succinate, trans-4-hydroxyproline, threonine, valine.

**Table S-2.** Metabolites observed in *E. coli* cultures grown under various levels of salt stress. Samples (N = 4 per condition) were cultured in M9 medium containing an additional 0, 150, 300, or 500 mM NaCl or 500 mM NaCl plus 10 mM glycine betaine. Metabolite concentrations are shown as millimolar levels observed in the NMR tubes as calculated by the FMQ and corrected ITOCSY protocols, respectively.

|               | 0 mM NaCl   |             |             |             | 150 mM NaCl |             |             |             |
|---------------|-------------|-------------|-------------|-------------|-------------|-------------|-------------|-------------|
|               | A           | B           | C           | D           | A           | B           | C           | D           |
| Acetate       | 0.07, 0.07  | 0.06, 0.06  | 0.11, 0.10  | 0.10, 0.10  | 0.17, 0.15  | 0.18, 0.18  | 0.17, 0.16  | 0.20, 0.20  |
| Adenosine     | 0.17, 0.13  | 0.20, 0.16  | 0.21, 0.22  | 0.21, 0.20  | 0.19, 0.16  | 0.25, 0.23  | 0.18, 0.20  | 0.18, 0.18  |
| Alanine       | 3.03, 2.89  | 2.10, 2.06  | 1.61, 1.57  | 1.33, 1.35  | 10.6, 10.5  | 11.0, 11.8  | 2.99, 3.17  | 3.17, 3.32  |
| AMP           | 0.06, 0.06  | 0.06, 0.06  | 0.08, 0.07  | 0.08, 0.07  | 0.10, 0.08  | 0.16, 0.15  | 0.06, 0.05  | 0.07, 0.06  |
| Aspartate     | 0.05, 0.04  | 0.08, 0.05  | 0.06, 0.06  | 0.06, 0.05  | 0.07, 0.06  | 0.15, 0.12  | 0.07, 0.06  | 0.08, 0.06  |
| Glucose       | 0.05, 0.02* | 0.08, 0.03* | 0.07, 0.02* | 0.08, 0.03* | 0.39, 0.17* | 0.52, 0.24* | 0.39, 0.19* | 0.40, 0.18* |
| Glutamate     | 0.83, 0.82  | 0.82, 0.79  | 2.12, 2.09  | 2.08, 2.03  | 2.99, 2.78  | 3.05, 3.04  | 4.56, 4.40  | 4.93, 4.89  |
| Glutamine     | 0.05, 0.01* | 0.06, 0.02* | 0.06, 0.01* | 0.08, 0.02* | 0.10, 0.03* | 0.10, 0.04* | 0.12, 0.04* | 0.10, 0.04* |
| Glutathione   | 0.10, 0.08  | 0.09, 0.08  | 0.17, 0.17  | 0.14, 0.13  | 0.20, 0.18  | 0.42, 0.36  | 0.21, 0.19  | 0.23, 0.18  |
| Histidine     | 0.02, 0.01  | 0.02, 0.01  | 0.02, 0.01  | 0.01, 0.01  | 0.02, 0.01  | 0.03, 0.02  | 0.01, 0.01  | 0.01, 0.01  |
| Isoleucine    | 0.05, 0.03* | 0.05, 0.03* | 0.06, 0.03* | 0.05, 0.02* | 0.05, 0.03* | 0.08, 0.05* | 0.05, 0.04* | 0.06, 0.04* |
| Leucine       | 0.11, 0.10  | 0.10, 0.09  | 0.12, 0.11  | 0.12, 0.11  | 0.26, 0.21  | 0.23, 0.21  | 0.12, 0.11  | 0.11, 0.10  |
| Lysine        | 0.11, 0.07  | 0.12, 0.07  | 0.14, 0.08  | 0.15, 0.08  | 0.16, 0.12  | 0.22, 0.15  | 0.21, 0.11  | 0.20, 0.10  |
| MES           | 3.86, 2.03* | 3.78, 2.05* | 4.18, 2.09* | 4.22, 1.92* | 4.17, 2.04* | 3.78, 2.23* | 4.19, 1.97* | 4.08, 2.19* |
| Methionine    | 0.06, 0.04* | 0.06, 0.03* | 0.08, 0.04* | 0.09, 0.05* | 0.08, 0.04* | 0.09, 0.04* | 0.10, 0.06* | 0.10, 0.04* |
| Phenylalanine | 0.03, 0.02  | 0.02, 0.02  | 0.04, 0.03  | 0.03, 0.03  | 0.04, 0.03  | 0.04, 0.04  | 0.02, 0.02  | 0.02, 0.02  |
| Proline       | 0.18, 0.04* | 0.18, 0.04* | 0.10, 0.02* | 0.09, 0.02* | 0.22, 0.04* | 0.20, 0.03* | 0.10, 0.03* | 0.08, 0.02* |
| Putrescine    | 0.19, 0.24  | 0.18, 0.23  | 0.31, 0.30  | 0.28, 0.26  | 0.19, 0.18  | 0.08, 0.49  | 0.15, 0.15  | 0.16, 0.15  |
| Succinate     | 0.81, 0.74  | 0.75, 0.7   | 1.24, 1.17  | 1.04, 0.98  | 1.38, 1.24  | 1.97, 1.86  | 1.36, 1.30  | 1.55, 1.56  |
| Threonine     | 0.07, 0.06  | 0.04, 0.03  | 0.05, 0.05  | 0.05, 0.04  | 0.09, 0.07  | 0.12, 0.10  | 0.06, 0.04  | 0.05, 0.05  |
| Trehalose     | 0.02, 0.01* | 0.03, 0.01* | 0.03, 0.01* | 0.03, 0.01* | 0.07, 0.03* | 0.04, 0.01* | 0.11, 0.05* | 0.10, 0.04* |
| Tyramine      | 0.05, 0.04  | 0.03, 0.02  | 0.04, 0.03  | 0.04, 0.03  | 0.05, 0.04  | 0.05, 0.04  | 0.04, 0.03  | 0.04, 0.03  |
| Uracil        | 0.53, 0.46  | 0.47, 0.43  | 0.57, 0.51  | 0.60, 0.51  | 0.89, 0.73  | 0.69, 0.57  | 0.50, 0.44  | 0.55, 0.53  |
| Valine        | 0.11, 0.09  | 0.07, 0.06  | 0.09, 0.08  | 0.07, 0.06  | 0.27, 0.22  | 0.29, 0.28  | 0.09, 0.08  | 0.09, 0.08  |

\* Glucose, isoleucine, MES, methionine, proline, and trehalose, levels calculated by the ITOCSY quantification protocol are unreliable because signals from these molecules were below the limit of detection in <sup>13</sup>C-specific ITOCSY spectra.

**Table S-2 (continued).**

|                      | 300 mM NaCl |             |             |             | 500 mM NaCl |             |             |             |
|----------------------|-------------|-------------|-------------|-------------|-------------|-------------|-------------|-------------|
|                      | A           | B           | C           | D           | A           | B           | C           | D           |
| <b>Acetate</b>       | 0.20, 0.20  | 0.56, 0.51  | 0.32, 0.31  | 0.16, 0.17  | 0.23, 0.24  | 0.10, 0.10  | 0.18, 0.20  | 0.28, 0.30  |
| <b>Adenosine</b>     | 0.08, 0.07  | 0.08, 0.08  | 0.10, 0.09  | 0.10, 0.12  | 0.06, 0.07  | 0.08, 0.08  | 0.08, 0.08  | 0.09, 0.09  |
| <b>Alanine</b>       | 4.04, 3.89  | 3.57, 3.53  | 4.05, 4.08  | 2.97, 3.24  | 2.78, 2.8   | 2.14, 2.11  | 3.16, 3.37  | 3.45, 3.58  |
| <b>AMP</b>           | 0.06, 0.04  | 0.06, 0.05  | 0.09, 0.08  | 0.05, 0.05  | 0.04, 0.04  | 0.03, 0.02  | 0.05, 0.05  | 0.07, 0.06  |
| <b>Aspartate</b>     | 0.03, 0.02  | 0.03, 0.02  | 0.03, 0.03  | 0.04, 0.03  | 0.03, 0.02  | 0.02, 0.01  | 0.04, 0.04  | 0.03, 0.03  |
| <b>Glucose</b>       | 2.57, 0.81* | 2.29, 0.75* | 2.19, 0.86* | 1.72, 0.70* | 3.13, 0.84* | 3.03, 0.85* | 3.81, 1.04* | 4.31, 1.04* |
| <b>Glutamate</b>     | 1.48, 1.46  | 0.47, 0.45  | 3.13, 3.35  | 3.04, 3.26  | 0.65, 0.71  | 0.95, 0.95  | 4.50, 4.79  | 4.71, 5.06  |
| <b>Glutamine</b>     | 0.12, 0.03* | 0.07, 0.02* | 0.10, 0.04* | 0.08, 0.04* | 0.10, 0.03* | 0.15, 0.04* | 0.18, 0.07* | 0.15, 0.07* |
| <b>Glutathione</b>   | 0.08, 0.06  | 0.06, 0.05  | 0.20, 0.20  | 0.14, 0.14  | 0.07, 0.06  | 0.08, 0.06  | 0.24, 0.24  | 0.20, 0.18  |
| <b>Histidine</b>     | 0.02, 0.01  | 0.01, 0.01  | 0.02, 0.01  | 0.01, 0.01  | 0.02, 0.01  | 0.01, 0.01  | 0.01, 0.01  | 0.01, 0.01  |
| <b>Isoleucine</b>    | 0.04, 0.02* | 0.04, 0.02* | 0.06, 0.04* | 0.05, 0.03* | 0.05, 0.03* | 0.03, 0.01* | 0.05, 0.03* | 0.06, 0.03* |
| <b>Leucine</b>       | 0.13, 0.12  | 0.13, 0.11  | 0.12, 0.11  | 0.10, 0.09  | 0.10, 0.11  | 0.07, 0.07  | 0.12, 0.12  | 0.13, 0.13  |
| <b>Lysine</b>        | 0.13, 0.07  | 0.12, 0.07  | 0.16, 0.10  | 0.10, 0.08  | 0.09, 0.05  | 0.11, 0.07  | 0.07, 0.06  | 0.12, 0.07  |
| <b>MES</b>           | 3.97, 1.83* | 4.01, 1.68* | 4.02, 1.99* | 3.82, 1.96* | 3.33, 1.86* | 3.12, 2.07* | 3.81, 2.14* | 3.96, 2.02* |
| <b>Methionine</b>    | 0.06, 0.03* | 0.05, 0.02* | 0.08, 0.04* | 0.06, 0.02* | 0.03, 0.01* | 0.04, 0.02* | 0.05, 0.02* | 0.05, 0.02* |
| <b>Phenylalanine</b> | 0.02, 0.02  | 0.03, 0.02  | 0.03, 0.03  | 0.02, 0.02  | 0.03, 0.02  | 0.01, 0.01  | 0.02, 0.02  | 0.03, 0.03  |
| <b>Proline</b>       | 0.20, 0.04* | 0.21, 0.04* | 0.12, 0.02* | 0.09, 0.02* | 0.19, 0.04* | 0.18, 0.03* | 0.09, 0.02* | 0.09, 0.01* |
| <b>Putrescine</b>    | 0.08, 0.08  | 0.08, 0.08  | 0.12, 0.12  | 0.09, 0.10  | 0.07, 0.07  | 0.05, 0.05  | 0.06, 0.07  | 0.07, 0.08  |
| <b>Succinate</b>     | 1.11, 1.03  | 1.26, 1.15  | 1.74, 1.68  | 0.94, 1.03  | 0.22, 0.23  | 0.11, 0.10  | 0.85, 0.89  | 1.09, 1.07  |
| <b>Threonine</b>     | 0.05, 0.04  | 0.06, 0.05  | 0.06, 0.05  | 0.04, 0.03  | 0.06, 0.05  | 0.04, 0.03  | 0.06, 0.04  | 0.07, 0.04  |
| <b>Trehalose</b>     | 0.83, 0.30* | 0.49, 0.16* | 0.71, 0.26* | 0.99, 0.28* | 0.42, 0.16* | 1.09, 0.32* | 2.41, 0.46* | 2.45, 0.36* |
| <b>Tyramine</b>      | 0.04, 0.03  | 0.04, 0.03  | 0.04, 0.04  | 0.03, 0.03  | 0.03, 0.02  | 0.02, 0.02  | 0.03, 0.02  | 0.03, 0.03  |
| <b>Uracil</b>        | 0.30, 0.27  | 0.31, 0.26  | 0.29, 0.28  | 0.31, 0.31  | 0.32, 0.32  | 0.25, 0.22  | 0.24, 0.24  | 0.26, 0.24  |
| <b>Valine</b>        | 0.15, 0.13  | 0.14, 0.13  | 0.13, 0.12  | 0.10, 0.11  | 0.13, 0.14  | 0.07, 0.06  | 0.12, 0.12  | 0.12, 0.12  |

\* Glucose, isoleucine, MES, methionine, proline, and trehalose, levels calculated by the ITOCSY quantification protocol are unreliable because signals from these molecules were below the limit of detection in <sup>13</sup>C-specific ITOCSY spectra.

**Table S-2 (continued).**

|                      | <b>500 mM + 10 mM Betaine</b> |             |             |             |
|----------------------|-------------------------------|-------------|-------------|-------------|
|                      | <b>A</b>                      | <b>B</b>    | <b>C</b>    | <b>D</b>    |
| <b>Acetate</b>       | 0.09, 0.09                    | 0.14, 0.15  | 0.13, 0.14  | 0.08, 0.08  |
| <b>Adenosine</b>     | 0.12, 0.12                    | 0.15, 0.11  | 0.12, 0.12  | 0.14, 0.15  |
| <b>Alanine</b>       | 5.64, 5.80                    | 5.20, 5.23  | 5.96, 6.39  | 6.86, 7.03  |
| <b>AMP</b>           | 0.04, 0.04                    | 0.04, 0.04  | 0.05, 0.05  | 0.05, 0.06  |
| <b>Aspartate</b>     | 0.04, 0.04                    | 0.03, 0.02  | 0.05, 0.04  | 0.12, 0.07  |
| <b>Glucose</b>       | 0.10, 0.05*                   | 0.18, 0.05* | 0.11, 0.04* | 0.08, 0.05* |
| <b>Glutamate</b>     | 1.26, 1.28                    | 0.81, 0.89  | 2.88, 2.94  | 3.40, 3.60  |
| <b>Glutamine</b>     | 0.06, 0.02*                   | 0.10, 0.03* | 0.09, 0.03* | 0.13, 0.04* |
| <b>Glutathione</b>   | 0.12, 0.12                    | 0.20, 0.21  | 0.19, 0.18  | 0.37, 0.33  |
| <b>Histidine</b>     | 0.01, 0.01                    | 0.02, 0.02  | 0.02, 0.01  | 0.02, 0.01  |
| <b>Isoleucine</b>    | 0.06, 0.03*                   | 0.08, 0.04* | 0.07, 0.03* | 0.05, 0.03* |
| <b>Leucine</b>       | 0.11, 0.12                    | 0.12, 0.11  | 0.12, 0.11  | 0.12, 0.11  |
| <b>Lysine</b>        | 0.08, 0.05                    | 0.13, 0.07  | 0.13, 0.08  | 0.08, 0.06  |
| <b>MES</b>           | 3.67, 2.13*                   | 3.52, 1.89* | 3.88, 2.27* | 3.94, 1.93* |
| <b>Methionine</b>    | 0.06, 0.02*                   | 0.05, 0.03* | 0.10, 0.05* | 0.08, 0.03* |
| <b>Phenylalanine</b> | 0.02, 0.02                    | 0.03, 0.03  | 0.03, 0.03  | 0.03, 0.02  |
| <b>Proline</b>       | 0.40, 0.02*                   | 0.34, 0.01* | 0.41, 0.02* | 0.35, 0.01* |
| <b>Putrescine</b>    | 0.21, 0.22                    | 0.22, 0.25  | 0.36, 0.39  | 0.29, 0.41  |
| <b>Succinate</b>     | 0.93, 0.90                    | 0.99, 0.96  | 1.46, 1.46  | 1.79, 1.76  |
| <b>Threonine</b>     | 0.08, 0.07                    | 0.11, 0.09  | 0.13, 0.14  | 0.15, 0.13  |
| <b>Trehalose</b>     | 0.04, 0.01*                   | 0.10, 0.01* | 0.08, 0.01* | 0.03, 0.01* |
| <b>Tyramine</b>      | 0.04, 0.03                    | 0.04, 0.03  | 0.04, 0.03  | 0.04, 0.04  |
| <b>Uracil</b>        | 0.40, 0.38                    | 0.46, 0.43  | 0.42, 0.39  | 0.49, 0.40  |
| <b>Valine</b>        | 0.23, 0.25                    | 0.20, 0.17  | 0.19, 0.18  | 0.22, 0.19  |

\* Glucose, isoleucine, MES, methionine, proline, and trehalose, levels calculated by the ITOCSY quantification protocol are unreliable, because signals from these molecules were below the limit of detection in <sup>13</sup>C-specific ITOCSY spectra.
